# Supplementary material for: Biomass burning sources control ambient particulate matter but traffic and industrial sources control VOCs and secondary pollutant formation during extreme pollution events in Delhi
Source: Copernicus journal article supplement (doi:10.5194/egusphere-2024-501), 2024-02-23
Supplement: Supplementary file 1 [file egusphere-2024-501-supplement.pdf]

## Biomass burning sources control ambient particulate matter but traffic and industrial sources control VOCs and secondary pollutant formation during extreme pollution events in Delhi

Arpit Awasthi<sup>1</sup>, Baerbel Sinha<sup>1</sup>, Haseeb Hakkim<sup>1</sup>, Sachin Mishra<sup>1</sup>, Varkrishna Mummidivarapu<sup>1</sup>, Gurmanjot Singh<sup>1</sup>, Sachin D. Ghude<sup>2</sup>, Vijay Kumar Soni<sup>3</sup>, Narendra Nigam<sup>3</sup>, Vinayak Sinha<sup>1</sup>, Madhavan N. Rajeevan<sup>4</sup>

<sup>1</sup>Department of Earth and Environmental Sciences, Indian Institute of Science Education and Research Mohali, Sector 81, S.A.S Nagar, Manauli PO, Punjab, 140306, India

<sup>2</sup>Indian Institute of Tropical Meteorology, Pashan, Pune 411 008, Ministry of Earth Sciences, India

<sup>3</sup>India Meteorological Department, New Delhi 110 003, Ministry of Earth Sciences, India

<sup>4</sup>Ministry of Earth Sciences, Government of India, New Delhi 110 003, India

Correspondence to: Baerbel Sinha (bsinha@iisermohali.ac.in)

**Table S1:** 111 NMVOCs species used in the PMF model, the table lists the major compound identifications and the references supporting such assignments from previous works along with detection limits.

| Sr. No | Protonated m/z | Potential contributor                          | Strong /Weak | Mean (with range) $\mu\text{g}/\text{m}^3$ | Sources                                                    | References                                                                     |
|--------|----------------|------------------------------------------------|--------------|--------------------------------------------|------------------------------------------------------------|--------------------------------------------------------------------------------|
| 1      | 31.014         | Formaldehyde<br>$\text{CH}_2\text{O}$          | Strong       | 1.063<br>(0.066-9.464)                     | Photochemical production, traffic, biomass burning         | Hatch et al. 2015, Stockwell et al. 2015, Koss et al. 2018                     |
| 2      | 33.030         | Methanol<br>$\text{CH}_4\text{O}$              | Strong       | 17.285<br>(3.522-127.853)                  | Photochemical production, biomass burning, biogenic        | Hatch et al. 2015, Stockwell et al. 2015, Koss et al. 2018                     |
| 3      | 41.035         | Propyne<br>$\text{C}_3\text{H}_4$              | Strong       | 9.149<br>(1.001-96.661)                    | Traffic, biomass burning                                   | Hatch et al. 2015, Stockwell et al. 2015, Koss et al. 2018, Hakkim et al. 2021 |
| 4      | 42.030         | Acetonitrile<br>$\text{C}_2\text{H}_3\text{N}$ | Strong       | 0.888<br>(0.208-5.208)                     | Biomass burning, industries                                | Hatch et al. 2015, 2017                                                        |
| 5      | 43.051         | Propene<br>$\text{C}_3\text{H}_6$              | Strong       | 5.117<br>(0.766-59.931)                    | Biomass burning, traffic                                   | Hakkim et al. 2021                                                             |
| 6      | 44.018         | Isocyanic acid<br>$\text{HNCO}$                | Strong       | 0.145<br>(0.007-1.231)                     | Oxidation of amines (secondary formation), biomass burning | Chandra & Sinha, 2016; Wang et al., 2020                                       |
| 7      | 45.030         | Acetaldehyde<br>$\text{C}_2\text{H}_4\text{O}$ | Strong       | 8.764<br>(1.432-55.175)                    | Biogenic, biomass burning, photochemical                   | Hatch et al. 2015, Stockwell et al. 2015, Koss et al. 2018, Kumar et al.       |

|    |         |                                                                                          |        |                           |                                                       |                                                                                         |
|----|---------|------------------------------------------------------------------------------------------|--------|---------------------------|-------------------------------------------------------|-----------------------------------------------------------------------------------------|
|    |         |                                                                                          |        |                           | production                                            | 2021                                                                                    |
| 8  | 46.025  | Formamide<br>CH <sub>4</sub> NO                                                          | Strong | 0.447<br>(0.004-8.3)      | Oxidation of amines (secondary formation)             | Yao et al. 2016; Wang et al. 2022                                                       |
| 9  | 47.009  | Formic acid<br>CH <sub>2</sub> O <sub>2</sub>                                            | Strong | 1.717<br>(0.004-31.063)   | Oxidation of amines (secondary formation)             | Yao et al. 2016; Wang et al. 2022                                                       |
| 10 | 47.0457 | Ethanol<br>C <sub>2</sub> H <sub>6</sub> O                                               | Strong | 0.625<br>(0.052-7.845)    | Industrial, Traffic                                   | Bruns et al. 2017; Koss et al. 2018                                                     |
| 11 | 48.048  | methoxyamine<br>CH <sub>5</sub> NO                                                       | Weak   | 0.011<br>(0-0.148)        | Oxidation of amines (secondary formation)             | Yáñez-Serrano et al. 2021                                                               |
| 12 | 49.007  | Methanethiol<br>CH <sub>4</sub> S                                                        | Strong | 0.15<br>(0.002-3.295)     | Industrial                                            | Toda et. al. 2010                                                                       |
| 13 | 53.035  | Vinylacetylene, 1-Buten-3-yne<br>C <sub>4</sub> H <sub>4</sub>                           | Strong | 0.662<br>(0.003-10.879)   | Biomass burning                                       | Hatch et al. 2015, Stockwell et al. 2015, Koss et al. 2018                              |
| 14 | 55.051  | 1,2-Butadiene, 1-Butyne, 2-Butyne, 1,3 Butadiene<br>C <sub>4</sub> H <sub>6</sub>        | Strong | 3.701<br>(0.418-30.204)   | Biomass burning                                       | Koss et al., 2018, Sarkar et al., 2017                                                  |
| 15 | 57.030  | Acrolein<br>C <sub>3</sub> H <sub>4</sub> O                                              | Strong | 0.802<br>(0-8.038)        | Biomass burning, waste burning                        | Kumar et al. 2021                                                                       |
| 16 | 57.067  | Methyl tert-butyl ether (MTBE) fragment /Butene<br>C <sub>4</sub> H <sub>8</sub>         | Strong | 7.293<br>(0.983-100.664)  | Biomass burning, waste burning, traffic               | Hakkim et al. 2021                                                                      |
| 17 | 59.046  | Acetone + Propanal<br>C <sub>3</sub> H <sub>6</sub> O                                    | Strong | 14.603<br>(2.341-145.458) | Biomass burning, industries, photochemical production | Hatch et al. 2015, Stockwell et al. 2015, Koss et al. 2018, Kumar et al. 2021           |
| 18 | 61.025  | Acetic acid+ Glycolaldehyde<br>C <sub>2</sub> H <sub>4</sub> O <sub>2</sub>              | Strong | 16.086<br>(0.695-170.723) | Photochemical production, biomass burning, industries | Kumar et al. 2021                                                                       |
| 19 | 62.997  | Vinyl chloride<br>C <sub>2</sub> H <sub>3</sub> Cl                                       | Weak   | 0.02<br>(0.001-0.235)     | PVC burning                                           | Hsu et. al. 2022, Fukusaki et al. 2021                                                  |
| 20 | 67.051  | Cyclopentadiene, monoterpene fragment, butanol fragment<br>C <sub>5</sub> H <sub>6</sub> | Strong | 0.781<br>(0.117-10.93)    | Biomass burning                                       | Hatch et al. 2015; Stockwell et al., 2015                                               |
| 21 | 69.031  | Furan<br>C <sub>4</sub> H <sub>4</sub> O                                                 | Strong | 0.231<br>(0.011-3.247)    | Biomass burning                                       | Coggon et al., 2019; Hatch et al. 2015; 2017; Koss et al., 2018; Stockwell et al., 2015 |
| 22 | 69.067  | Isoprene + 2-methyl-3-butene-2-ol fragment<br>C <sub>5</sub> H <sub>8</sub>              | Strong | 2.234<br>(0.294-17.733)   | Biogenic sources, biomass burning                     | Stockwell et al., 2015; Jordan et al., 2009                                             |
| 23 | 71.047  | Methyl Vinyl Ketone, Methacrolein, Butenal                                               | Strong | 1.015<br>(0.099-4.729)    | Biomass burning,                                      | Stockwell et al., 2015; de                                                              |

|    |        |                                                                                                 |        |                         |                                                           |                                                                                               |
|----|--------|-------------------------------------------------------------------------------------------------|--------|-------------------------|-----------------------------------------------------------|-----------------------------------------------------------------------------------------------|
|    |        | C <sub>4</sub> H <sub>6</sub> O                                                                 |        |                         | photochemical production                                  | Gouw et al., 2007                                                                             |
| 24 | 73.026 | Methyl glyoxal<br>C <sub>3</sub> H <sub>4</sub> O <sub>2</sub>                                  | Strong | 0.56<br>(0.004-8.797)   | Oxidation of amines<br>(secondary formation)              | Yao et al. 2016;<br>Wang et al. 2022                                                          |
| 25 | 73.062 | Butanal, Butanone, MEK<br>C <sub>4</sub> H <sub>8</sub> O                                       | Strong | 2.534<br>(0.315-43.128) | Biomass burning,<br>biogenic,<br>photochemical production | Hatch et al. 2015,<br>Stockwell et al. 2015, Koss et al. 2018                                 |
| 26 | 75.042 | Hydroxyacetone/<br>Propanoic acid<br>C <sub>3</sub> H <sub>6</sub> O <sub>2</sub>               | Strong | 1.664<br>(0.116-14.045) | Biomass burning,<br>biogenic, traffic                     | Kumar et al. 2021                                                                             |
| 27 | 76.037 | Nitroethane<br>C <sub>2</sub> H <sub>5</sub> NO <sub>2</sub>                                    | Strong | 0.036<br>(0.002-0.308)  | Biomass burning                                           | Palm et al. 2020,<br>Harrison et al. 2005                                                     |
| 28 | 79.052 | Benzene<br>C <sub>6</sub> H <sub>6</sub>                                                        | Strong | 6.07<br>(0.305-68.694)  | Biomass burning, traffic                                  | Hatch et al. 2015,<br>Stockwell et al. 2015, Koss et al. 2018, Hakkim et al. 2021             |
| 29 | 81.031 | Cyclopentadienone<br>C <sub>5</sub> H <sub>4</sub> O                                            | Strong | 0.102<br>(0.001-0.896)  | Biomass burning                                           | Hatch et al. 2015,<br>Koss et al. 2018;<br>Nowakowska et al. 2018                             |
| 30 | 83.047 | Methyl furan<br>C <sub>5</sub> H <sub>6</sub> O                                                 | Strong | 0.363<br>(0.032-3.68)   | Biomass burning                                           | Coggon et al., 2019;<br>Hatch et al. 2015;<br>2017; Koss et al., 2018; Stockwell et al., 2015 |
| 31 | 83.084 | Cyclohexene, Hexyne isomers<br>C <sub>6</sub> H <sub>10</sub>                                   | Strong | 1.406<br>(0.345-12.044) | Biomass burning,<br>biogenic, traffic                     | Stockwell et al., 2015, Koss et al., 2018; Kumar et al., 2021;                                |
| 32 | 84.080 | Pentanenitrile/<br>Methylbutanenitrile isomers/<br>C5-amines<br>C <sub>5</sub> H <sub>9</sub> N | Strong | 0.037<br>(0-0.495)      | Biogenic,<br>biomass burning                              | Hatch et al. 2015, 2017                                                                       |
| 33 | 85.027 | Furanone / butenedial<br>C <sub>4</sub> H <sub>4</sub> O <sub>2</sub>                           | Strong | 0.466<br>(0.015-6.719)  | Biomass burning,<br>photochemical production              | Coggon et al., 2019;<br>Hatch et al. 2015;<br>2017; Koss et al., 2018; Stockwell et al., 2015 |
| 34 | 85.063 | Cyclopentanone<br>C <sub>5</sub> H <sub>8</sub> O                                               | Strong | 0.337<br>(0.042-1.971)  | Biomass burning, traffic                                  | Hatch et al. 2015,<br>Koss et al. 2018;<br>Nowakowska et al. 2018                             |
| 35 | 85.094 | Cyclohexane, Hexene<br>C <sub>6</sub> H <sub>12</sub>                                           | Strong | 0.326<br>(0.051-4.057)  | Biomass burning, Traffic                                  | Fleming et al. 2018,<br>Hakkim et al. 2021                                                    |
| 36 | 87.043 | Isomers of C4 carboxylic acid/ester/diketone<br>C <sub>4</sub> H <sub>6</sub> O <sub>2</sub>    | Strong | 1.118<br>(0.06-8.545)   | Biomass burning,<br>photochemical production              | Kumar et al. 2021,<br>Hatch et al. 2015,<br>Koss et al. 2018;<br>Nowakowska et al. 2018       |
| 37 | 87.079 | Pentanone, methyl-buteneol, Pentanal<br>C <sub>5</sub> H <sub>10</sub> O                        | Strong | 0.295<br>(0.05-1.841)   | Biomass burning,<br>biogenic                              | Hatch et al. 2015,<br>Stockwell et al. 2015, Koss et al. 2018                                 |

|    |         |                                                                                                                     |        |                          |                                                        |                                                                                                            |
|----|---------|---------------------------------------------------------------------------------------------------------------------|--------|--------------------------|--------------------------------------------------------|------------------------------------------------------------------------------------------------------------|
| 38 | 89.058  | Isomers of C4-carboxylic acid/ester<br>C <sub>4</sub> H <sub>8</sub> O <sub>2</sub>                                 | Strong | 1.306<br>(0.087-17.301)  | Industrial solvent                                     | Kamarulzaman et al. 2019                                                                                   |
| 39 | 91.053  | Monoterpene Fragment<br>C <sub>7</sub> H <sub>6</sub>                                                               | Strong | 1.24<br>(0.058-20.618)   | Industrial, Traffic                                    | Kamarulzaman et al. 2019                                                                                   |
| 40 | 93.069  | Toluene<br>C <sub>7</sub> H <sub>8</sub>                                                                            | Strong | 18.285<br>(0.43-321.651) | Biomass burning traffic, chemical production, biogenic | Hatch et al. 2015, Stockwell et al. 2015, Koss et al. 2018, Hakkim et al. 2021                             |
| 41 | 95.048  | Phenol<br>C <sub>6</sub> H <sub>6</sub> O                                                                           | Strong | 0.835<br>(0.069-9.968)   | Biomass burning, photochemical production              | Hakkim et al., 2021; Koss et al., 2018; Kumar et al., 2021                                                 |
| 42 | 95.084  | Monoterpene Fragment<br>C <sub>7</sub> H <sub>10</sub>                                                              | Strong | 0.826<br>(0.111-13.348)  | Industrial, traffic                                    | Kamarulzaman et al. 2019                                                                                   |
| 43 | 97.027  | Furfural/ isomers of diketone/carboxylic acid/ester<br>C <sub>5</sub> H <sub>4</sub> O <sub>2</sub>                 | Strong | 0.649<br>(0.026-17.29)   | Biomass burning                                        | Kumar et al. 2021, Coggon et al., 2019; Hatch et al. 2015; 2017; Koss et al., 2018; Stockwell et al., 2015 |
| 44 | 97.063  | C2 substituted furan, methyl Cyclopentenone<br>C <sub>6</sub> H <sub>8</sub> O                                      | Strong | 0.277<br>(0.024-2.555)   | Biomass burning                                        | Coggon et al., 2019; Hatch et al. 2015; 2017; Koss et al., 2018; Stockwell et al., 2015                    |
| 45 | 97.100  | Cycloheptene, Alkyl fragment<br>C <sub>7</sub> H <sub>12</sub>                                                      | Strong | 0.634<br>(0.104-7.483)   | Biomass burning                                        | Stockwell et al., 2015; Koss et al., 2018; Kumar et al., 2021                                              |
| 46 | 99.043  | Furfuryl alcohol, Methyl-furanone<br>C <sub>5</sub> H <sub>6</sub> O <sub>2</sub>                                   | Strong | 0.599<br>(0.025-4.61)    | Photochemical production, Biomass burning              | Coggon et al., 2019; Hatch et al. 2015; 2017; Koss et al., 2018; Stockwell et al., 2015                    |
| 47 | 99.079  | Cyclohexanone/isomers of C6-aldehyde/ketone<br>C <sub>6</sub> H <sub>10</sub> O                                     | Strong | 1.033<br>(0.088-23.49)   | Industrial                                             | Gupta et al. 1979                                                                                          |
| 48 | 99.116  | Methylcyclohexane, Heptene & other hydrocarbons<br>C <sub>7</sub> H <sub>14</sub>                                   | Weak   | 0.034<br>(0.002-0.472)   | asphalt degassing                                      | Khare et al., 2020                                                                                         |
| 49 | 101.059 | Pentanedione/ isomers of C5-diketone/carboxylic acid/ester/aldehyde<br>C <sub>5</sub> H <sub>8</sub> O <sub>2</sub> | Strong | 0.777<br>(0.048-5.073)   | Biomass burning                                        | Hatch et al. 2015, Koss et al. 2018; Nowakowska et al. 2018                                                |
| 50 | 105.069 | Styrene<br>C <sub>8</sub> H <sub>8</sub>                                                                            | Strong | 1.556<br>(0.13-35.843)   | Biomass burning traffic, chemical production           | Jordan et al., 2009; Stockwell et al., 2015                                                                |
| 51 | 107.050 | Benzaldehyde/ isomers of C7-aldehyde/ ketone<br>C <sub>7</sub> H <sub>6</sub> O                                     | Strong | 0.484<br>(0.003-4.687)   | Biomass burning, photochemical production              | Hatch et al. 2015, Stockwell et al. 2015, Koss et al. 2018                                                 |

|    |         |                                                                                                                   |        |                         |                                                           |                                                                                                     |
|----|---------|-------------------------------------------------------------------------------------------------------------------|--------|-------------------------|-----------------------------------------------------------|-----------------------------------------------------------------------------------------------------|
| 52 | 107.085 | Sum of C8-Aromatics<br>C <sub>8</sub> H <sub>10</sub>                                                             | Strong | 11.214<br>(0.4-193.065) | Biomass<br>burning, traffic                               | Hatch et al. 2015,<br>Stockwell et al.<br>2015, Koss et al.<br>2018, Hakkim et al.<br>2021          |
| 53 | 109.064 | Methylphenol isomers,<br>Anisole<br>C <sub>7</sub> H <sub>8</sub> O                                               | Strong | 0.24<br>(0.021-2.61)    | Biomass<br>Burning                                        | Hatch et al. 2015                                                                                   |
| 54 | 109.100 | Terpene<br>fragment/Cyclooctadiene<br>C <sub>8</sub> H <sub>12</sub>                                              | Strong | 0.511<br>(0.089-5.681)  | Industrial,<br>traffic                                    | Kamarulzaman et.<br>al. 2019                                                                        |
| 55 | 111.042 | Methylfurfural,<br>Hydroxyphenol<br>C <sub>6</sub> H <sub>6</sub> O <sub>2</sub>                                  | Strong | 0.208<br>(0.002-4.11)   | Biomass<br>burning,<br>photochemical<br>production        | Coggon et al., 2019;<br>Hatch et al. 2015;<br>2017; Koss et al.,<br>2018; Stockwell et<br>al., 2015 |
| 56 | 111.080 | C3-substituted furans, C2-<br>substituted cyclopentene,<br>methyl cyclohexene<br>C <sub>7</sub> H <sub>10</sub> O | Strong | 0.195<br>(0.024-1.519)  | Biomass<br>burning                                        | Coggon et al., 2019;<br>Hatch et al. 2015;<br>2017; Koss et al.,<br>2018; Stockwell et<br>al., 2015 |
| 57 | 111.116 | Ethenyl cyclohexane<br>C <sub>8</sub> H <sub>14</sub>                                                             | Strong | 0.434<br>(0.078-5.193)  | Ring-opening<br>products of<br>cyclic alkanes             | Wang et. al. 2015                                                                                   |
| 58 | 113.059 | Dimethylbutenedial / C4-<br>substituted aldehyde<br>C <sub>6</sub> H <sub>8</sub> O <sub>2</sub>                  | Strong | 0.403<br>(0.023-2.736)  | Oxidation of<br>aromatic<br>compounds,<br>biomass burning | Zaytsev et al., 2019                                                                                |
| 59 | 115.039 | Hydroxymethyl furanone/<br>methylepoxybutanedial<br>C <sub>5</sub> H <sub>6</sub> O <sub>3</sub>                  | Strong | 0.119<br>(0.004-1.797)  | Photochemical<br>production,<br>Biomass<br>burning        | Coggon et al., 2019;<br>Hatch et al. 2015;<br>2017; Koss et al.,<br>2018; Stockwell et<br>al., 2015 |
| 60 | 115.075 | Isomers of C6-<br>diketones/aldehyde/carbo<br>xylic acid/ester<br>C <sub>6</sub> H <sub>10</sub> O <sub>2</sub>   | Strong | 0.357<br>(0.024-2.187)  | Oxidation of<br>polyaromatic<br>hydrocarbons              | Bruns et al. 2017                                                                                   |
| 61 | 116.108 | C6-amides<br>C <sub>6</sub> H <sub>13</sub> NO                                                                    | Weak   | 0.035<br>(0-0.255)      | Photooxidation<br>of amines                               | Yao et al. 2016                                                                                     |
| 62 | 119.085 | Terpene fragment<br>C <sub>9</sub> H <sub>10</sub>                                                                | Strong | 0.608<br>(0.062-9.105)  | Traffic                                                   | Erickson et. al.<br>2013                                                                            |
| 63 | 121.064 | Tolualdehyde/ isomers of<br>C8-aldehyde/ketone<br>C <sub>8</sub> H <sub>8</sub> O                                 | Strong | 0.578<br>(0.048-6.186)  | Biomass<br>burning                                        | Hatch et al. 2015,<br>Koss et al. 2018                                                              |
| 64 | 121.101 | Sum of C-9 aromatics<br>C <sub>9</sub> H <sub>12</sub>                                                            | Strong | 5.67<br>(0.174-125.472) | Traffic, Biomass<br>burning                               | Hatch et al. 2015,<br>Stockwell et al.<br>2015, Koss et al.<br>2018                                 |
| 65 | 123.044 | Hydroxybenzaldehyde/iso<br>mers of C7- carboxylic<br>acid/ ester<br>C <sub>7</sub> H <sub>6</sub> O <sub>2</sub>  | Strong | 0.307<br>(0.009-2.77)   | Photochemical<br>production,<br>Biomass<br>burning        | Hatch et al. 2015,<br>Koss et al. 2018;<br>Nowakowska et al.<br>2018                                |
| 66 | 123.080 | C2-substituted phenol,<br>methyl anisole<br>C <sub>8</sub> H <sub>10</sub> O                                      | Strong | 0.146<br>(0.013-1.255)  | Oxidation of<br>polyaromatic<br>hydrocarbons              | Bruns et al. 2017                                                                                   |
| 67 | 123.12  | Santene, Cyclopentadiene                                                                                          | Strong | 0.349                   | asphalt                                                   | Khare et al., 2020,                                                                                 |

|    |         |                                                                                                                   |        |                         |                                                           |                                                                                                       |
|----|---------|-------------------------------------------------------------------------------------------------------------------|--------|-------------------------|-----------------------------------------------------------|-------------------------------------------------------------------------------------------------------|
|    |         | & other hydrocarbons<br>C <sub>9</sub> H <sub>14</sub>                                                            |        | (0.063-3.73)            | degassing                                                 | Kılıç et al., 2018                                                                                    |
| 68 | 124.039 | Nitrobenzene<br>C <sub>6</sub> H <sub>5</sub> NO <sub>2</sub>                                                     | Strong | 0.054<br>(0.004-0.871)  | Traffic                                                   | Palm et al. 2020,<br>Harrison et al. 2005                                                             |
| 69 | 125.060 | Guaiacol/ isomers of C7-<br>carboxylic acid/ester<br>C <sub>7</sub> H <sub>8</sub> O <sub>2</sub>                 | Strong | 0.162<br>(0.01-2.15)    | Biomass<br>burning                                        | Hatch et al. 2015,<br>Koss et al. 2018;<br>Nowakowska et al.<br>2018                                  |
| 70 | 125.133 | Nonyne, nondiene<br>C <sub>9</sub> H <sub>16</sub>                                                                | Strong | 0.157<br>(0.033-1.702)  | asphalt<br>degassing                                      | Khare et al., 2020,<br>Kılıç et al., 2018                                                             |
| 71 | 127.039 | Hydroxymethyl furfural<br>C <sub>6</sub> H <sub>6</sub> O <sub>3</sub>                                            | Strong | 0.116<br>(0.004-2.045)  | biomass burning                                           | Koss et al., 2018                                                                                     |
| 72 | 127.075 | Isomers of C7-carboxylic<br>acid/ester/<br>aldehyde/ketone<br>C <sub>7</sub> H <sub>10</sub> O <sub>2</sub>       | Strong | 0.226<br>(0.014-1.5)    | Oxidation of<br>aromatic<br>compounds,<br>biomass burning | Zaytesv et al., 2019                                                                                  |
| 73 | 129.070 | Naphthalene<br>C <sub>10</sub> H <sub>8</sub>                                                                     | Strong | 1.043<br>(0.099-12.618) | Traffic, biomass<br>burning                               | Hakkim et al., 2021;<br>Koss et al., 2018;<br>Kumar et al., 2021                                      |
| 74 | 129.092 | Isomers of C9-<br>acetaldehyde/ ketone/<br>Carboxylic acid/ester<br>C <sub>7</sub> H <sub>12</sub> O <sub>2</sub> | Strong | 0.176<br>(0.01-1.274)   | Oxidation of<br>polyaromatic<br>hydrocarbons              | Bruns et al. 2017,<br>Lignell et al. 2013                                                             |
| 75 | 133.065 | Methyl benzofuran<br>C <sub>9</sub> H <sub>8</sub> O                                                              | Strong | 0.078<br>(0.007-0.617)  | Biomass<br>Burning                                        | Hatch et al. 2015                                                                                     |
| 76 | 133.102 | Ethyl styrene,<br>tetrahydronaphthalene<br>C <sub>10</sub> H <sub>12</sub>                                        | Strong | 0.457<br>(0.044-7.886)  | Traffic                                                   | Yáñez-Serrano et al.<br>2021                                                                          |
| 77 | 135.080 | Isomers of C9-<br>acetaldehyde/ ketone<br>C <sub>9</sub> H <sub>10</sub> O                                        | Strong | 0.172<br>(0.007-1.367)  | Traffic                                                   | Knighton et. al.<br>2007                                                                              |
| 78 | 135.118 | P-cymene, C4-substituted<br>benzene, C2-substituted<br>xylene<br>C <sub>10</sub> H <sub>14</sub>                  | Strong | 2.509<br>(0.091-71.697) | Traffic                                                   | Hakkim et al. 2021                                                                                    |
| 79 | 137.133 | Sum of Monoterpenes<br>(MT)<br>C <sub>10</sub> H <sub>16</sub>                                                    | Strong | 2.66<br>(0.167-127.676) | Industrial,<br>biogenic,<br>biomass<br>burning, traffic   | Guenther et al.,<br>2006;<br>Kamarulzaman et.<br>al. 2019 Koss et al.,<br>2018; Kumar et al.,<br>2021 |
| 80 | 138.056 | Nitrotoluene/ salicylamide<br>C <sub>7</sub> H <sub>7</sub> NO <sub>2</sub>                                       | Weak   | 0.036<br>(0.001-0.707)  | Oxidation of<br>toluene                                   | Ramasamy et al.,<br>2019                                                                              |
| 81 | 143.086 | Methyl naphthalene<br>C <sub>11</sub> H <sub>10</sub>                                                             | Strong | 0.19<br>(0.015-2.848)   | Biomass<br>Burning, Traffic                               | Hatch et al. 2015;<br>Yáñez-Serrano et al.<br>2021                                                    |
| 82 | 143.108 | Isomers of C8-<br>aldehyde/ketone/carboxylic<br>acid /ester<br>C <sub>8</sub> H <sub>14</sub> O <sub>2</sub>      | Strong | 0.153<br>(0.022-0.942)  | Oxidation of<br>polyaromatic<br>hydrocarbons              | Bruns et al. 2017                                                                                     |
| 83 | 145.051 | Organic acids/<br>levoglucosan fragment<br>C <sub>6</sub> H <sub>8</sub> O <sub>4</sub>                           | Strong | 0.068<br>(0.002-1.626)  | Biomass<br>Burning                                        | Hatch et al. 2015,<br>Koss et al. 2018;<br>Nowakowska et al.<br>2018                                  |

|     |         |                                                                                                       |        |                        |                                        |                                              |
|-----|---------|-------------------------------------------------------------------------------------------------------|--------|------------------------|----------------------------------------|----------------------------------------------|
| 84  | 145.102 | C2-substituted indene<br>C <sub>11</sub> H <sub>12</sub>                                              | Weak   | 0.062<br>(0.007-0.814) | Asphalt degassing                      | Khare et al., 2020                           |
| 85  | 145.123 | Isomer of C8-carboxylic acid/ C8-ester<br>C <sub>8</sub> H <sub>16</sub> O <sub>2</sub>               | Strong | 0.072<br>(0.003-0.96)  | Oxidation of polyaromatic hydrocarbons | Bruns et al. 2017, Mochizuki et al. 2019     |
| 86  | 146.977 | Isomers of Dichlorobenzene<br>C <sub>6</sub> H <sub>4</sub> Cl <sub>2</sub>                           | Strong | 0.352<br>(0.009-5.79)  | Industrial pesticides                  | Graus et al. 2010, Yáñez-Serrano et al. 2021 |
| 87  | 147.118 | Cyclopentylbenzene & other hydrocarbons<br>C <sub>11</sub> H <sub>14</sub>                            | Strong | 0.318<br>(0.038-4.599) | asphalt degassing                      | Khare et al., 2020                           |
| 88  | 149.024 | Phthalic anhydride/Benzofurandione<br>C <sub>8</sub> H <sub>4</sub> O <sub>3</sub>                    | Strong | 0.195<br>(0.003-4.508) | Oxidation of polyaromatic hydrocarbons | Bruns et al. 2017                            |
| 89  | 149.096 | Isomers of C10-aldehyde/ ketone<br>C <sub>10</sub> H <sub>12</sub> O                                  | Strong | 0.094<br>(0.008-1.25)  | asphalt degassing                      | Khare et al., 2020                           |
| 90  | 153.092 | Isomers of C9- carboxylic acid/ester<br>C <sub>9</sub> H <sub>12</sub> O <sub>2</sub>                 | Strong | 0.102<br>(0.01-1.413)  | Oxidation of monoterpenes              | Gkatzelis et al. 2018                        |
| 91  | 153.128 | Isomers of C10-aldehyde/ ketone<br>C <sub>10</sub> H <sub>16</sub> O                                  | Strong | 0.31<br>(0.021-7.93)   | Oxidation of monoterpenes              | Camredon et al.: 2010                        |
| 92  | 154.052 | Nitrobenzyl alcohol/Nitrocresols, methyl-nitrophenol<br>C <sub>7</sub> H <sub>7</sub> NO <sub>3</sub> | Strong | 0.077<br>(0.003-0.577) | Oxidation of toluene                   | Ramasamy et al., 2019                        |
| 93  | 155.108 | Isomers of C9-ketone/ C9-carboxylic acid/ C9-ester<br>C <sub>9</sub> H <sub>14</sub> O <sub>2</sub>   | Strong | 0.104<br>(0.008-0.759) | Oxidation of monoterpenes              | Camredon et al.: 2010, Gkatzelis et al. 2018 |
| 94  | 155.144 | Isomers of C10-aldehyde/ketone<br>C <sub>10</sub> H <sub>18</sub> O                                   | Strong | 0.092<br>(0.008-1.238) | asphalt degassing                      | Khare et al., 2020                           |
| 95  | 157.099 | C2-substituted naphthalene<br>C <sub>12</sub> H <sub>12</sub>                                         | Strong | 0.144<br>(0.017-1.209) | asphalt degassing                      | Khare et al., 2020, Kılıç et al., 2018       |
| 96  | 157.122 | C9-ester/C9-organic acid<br>C <sub>9</sub> H <sub>16</sub> O <sub>2</sub>                             | Strong | 0.109<br>(0.012-1.035) | Oxidation of monoterpenes              | Lignell et al. 2013; Camredon et al. 2010    |
| 97  | 159.140 | C9-organic acid<br>C <sub>9</sub> H <sub>18</sub> O <sub>2</sub>                                      | Weak   | 0.056<br>(0.002-0.559) | Oxidation of monoterpenes              | Mochizuki et al. 2019                        |
| 98  | 161.134 | Cyclohexylbenzene, butyl styrene, cyclopentylmethylbenzene<br>C <sub>12</sub> H <sub>16</sub>         | Strong | 0.161<br>(0.016-2.527) | asphalt degassing                      | Khare et al., 2020 Kılıç et al., 2018        |
| 99  | 175.150 | Trimethyltetralin/ ionene<br>C <sub>13</sub> H <sub>18</sub>                                          | Strong | 0.086<br>(0.007-1.677) | asphalt degassing                      | Khare et al., 2020                           |
| 100 | 177.056 | Formylcinnamic acid / hydroxy-methyl-coumarin<br>C <sub>10</sub> H <sub>8</sub> O <sub>3</sub>        | Strong | 0.105<br>(0.006-0.852) | asphalt degassing                      | Xing et al. 2023                             |
| 101 | 177.165 | C7-substituted benzene,<br>C <sub>13</sub> H <sub>20</sub>                                            | Strong | 0.13<br>(0.013-2.594)  | asphalt degassing                      | Khare et al., 2020                           |
| 102 | 179.181 | C3-substituted adamantane<br>C <sub>13</sub> H <sub>22</sub>                                          | Weak   | 0.06<br>(0.006-0.878)  | asphalt degassing                      | Khare et al., 2020                           |

|     |         |                                                                                                      |      |                        |                                 |                                                |
|-----|---------|------------------------------------------------------------------------------------------------------|------|------------------------|---------------------------------|------------------------------------------------|
| 103 | 183.121 | Bibenzyl<br>C <sub>14</sub> H <sub>14</sub>                                                          | Weak | 0.029<br>(0.004-0.2)   | asphalt<br>degassing            | Khare et al., 2020                             |
| 104 | 185.121 | cis-Pinonic acid / C10-ester<br>C <sub>10</sub> H <sub>16</sub> O <sub>3</sub>                       | Weak | 0.054<br>(0.007-1.571) | Oxidation of<br>monoterpenes    | Camredon et al.<br>2010, Khare et. al.<br>2020 |
| 105 | 187.148 | C4-substituted<br>dihydroazulene, benzyl<br>cycloheptene<br>C <sub>14</sub> H <sub>18</sub>          | Weak | 0.039<br>(0.005-0.306) | asphalt<br>degassing            | Khare et al. 2020,<br>Loubet et al. 2022       |
| 106 | 189.165 | C4-substituted<br>dihydronaphthalene,<br>cyclopentylpropylbenzene<br>C <sub>14</sub> H <sub>20</sub> | Weak | 0.053<br>(0.006-0.818) | asphalt<br>degassing            | Khare et al., 2020                             |
| 107 | 191.181 | C8-substituted benzene<br>C <sub>14</sub> H <sub>22</sub>                                            | Weak | 0.068<br>(0.007-0.892) | asphalt<br>degassing            | Khare et al., 2020                             |
| 108 | 195.138 | Myrtenyl acetate/C12-<br>organic acid/C12-ester<br>C <sub>12</sub> H <sub>18</sub> O <sub>2</sub>    | Weak | 0.029<br>(0.003-0.766) | Oxidation of<br>biomass burning | Haeri, 2023                                    |
| 109 | 217.195 | C6-substituted<br>dihydronaphthalene<br>C <sub>16</sub> H <sub>24</sub>                              | Weak | 0.026<br>(0.003-0.307) | asphalt<br>degassing            | Khare et al., 2020                             |
| 110 | 233.228 | C11-substituted benzene<br>C <sub>17</sub> H <sub>28</sub>                                           | Weak | 0.023<br>(0.002-0.215) | asphalt<br>degassing            | Khare et al., 2020,<br>Xu et al. 2022          |
| 111 | 247.243 | C12-substituted benzene<br>C <sub>18</sub> H <sub>30</sub>                                           | Weak | 0.022<br>(0.002-0.158) | asphalt<br>degassing            | Khare et al., 2020                             |

**Table S2:** List of Constraints incorporated in the PMF model

| Sr. No. | Factor   | Element                | Type                |
|---------|----------|------------------------|---------------------|
| 1       | Biogenic | m/z 42.030             | Pull Down Maximally |
| 2       | Biogenic | m/z 93.069             | Pull Down Maximally |
| 3       | Biogenic | m/z 107.085            | Pull Down Maximally |
| 4       | Biogenic | m/z 121.101            | Pull Down Maximally |
| 5       | Biogenic | 10/16/2022 11:00:00 PM | Pull Down Maximally |
| 6       | Biogenic | 10/17/2022 1:00:00 AM  | Pull Down Maximally |
| 7       | Biogenic | 10/17/2022 12:00:00 AM | Pull Down Maximally |
| 8       | Biogenic | 10/17/2022 2:00:00 AM  | Pull Down Maximally |
| 9       | Biogenic | 10/16/2022 10:00:00 PM | Pull Down Maximally |
| 10      | Biogenic | 10/16/2022 9:00:00 PM  | Pull Down Maximally |



|    |                          |                        |                     |
|----|--------------------------|------------------------|---------------------|
| 11 | Biogenic                 | 10/21/2022 10:00:00 PM | Pull Down Maximally |
| 12 | Biogenic                 | 10/21/2022 11:00:00 PM | Pull Down Maximally |
| 13 | Biogenic                 | 10/22/2022 12:00:00 AM | Pull Down Maximally |
| 14 | Biogenic                 | 10/21/2022 9:00:00 PM  | Pull Down Maximally |
| 15 | Biogenic                 | 10/21/2022 8:00:00 PM  | Pull Down Maximally |
| 16 | Biogenic                 | 10/22/2022 6:00:00 PM  | Pull Down Maximally |
| 17 | Biogenic                 | 10/23/2022 7:00:00 PM  | Pull Down Maximally |
| 18 | Biogenic                 | 10/26/2022 11:00:00 PM | Pull Down Maximally |
| 19 | Photochemical            | m/z 42.030             | Pull Down Maximally |
| 20 | Photochemical            | m/z 93.069             | Pull Down Maximally |
| 21 | Photochemical            | m/z 107.085            | Pull Down Maximally |
| 22 | Photochemical            | m/z 121.101            | Pull Down Maximally |
| 23 | Photochemical            | 9/20/2022 2:00:00 AM   | Pull Down Maximally |
| 24 | Photochemical            | 9/20/2022 11:00:00 PM  | Pull Down Maximally |
| 25 | Photochemical            | 9/22/2022 1:00:00 AM   | Pull Down Maximally |
| 26 | Photochemical            | 9/23/2022 10:00:00 PM  | Pull Down Maximally |
| 27 | Photochemical            | 9/24/2022 1:00:00 AM   | Pull Down Maximally |
| 28 | Photochemical            | 10/4/2022 2:00:00 AM   | Pull Down Maximally |
| 29 | Photochemical            | 10/4/2022 4:00:00 AM   | Pull Down Maximally |
| 30 | Cooking                  | 10/17/2022 8:00:00 PM  | Pull Up Maximally   |
| 31 | Solvents                 | 11/8/2022 4:00:00 AM   | Pull Up Maximally   |
| 32 | Road Construction        | 10/17/2022 9:00:00 PM  | Pull Up Maximally   |
| 33 | Petrol 4-Wheeler         | 10/18/2022 11:00:00 PM | Pull Up Maximally   |
| 34 | Paddy                    | 11/12/2022 1:00:00 AM  | Pull Up Maximally   |
| 35 | Paddy                    | 11/12/2022 12:00:00 AM | Pull Up Maximally   |
| 36 | Heating & Waste Disposal | 11/19/2022 11:00:00 PM | Pull Up Maximally   |
| 37 | Petrol 2-Wheeler         | 10/17/2022 9:00:00 PM  | Pull Up Maximally   |
| 38 | Industrial               | 10/16/2022 11:00:00 PM | Pull Up Maximally   |
| 39 | CNG                      | 10/16/2022 7:00:00 PM  | Pull Up Maximally   |

**Table S3:** Contains the SOA yields for 53 compounds to calculate the SOAP

| <b>Sr. No.</b> | <b>m/z</b> | <b>SOAP</b> | <b>References</b>                                                                |
|----------------|------------|-------------|----------------------------------------------------------------------------------|
| 1              | 31.014     | 0.7         | Derwent et. al. 2010                                                             |
| 2              | 33.030     | 0.3         | Derwent et. al. 2010                                                             |
| 3              | 53.035     | 0.1         | Derwent et. al. 2010                                                             |
| 4              | 55.051     | 0.6         | Derwent et. al. 2010                                                             |
| 5              | 61.025     | 30.6        | Xiong et. al. 2020                                                               |
| 6              | 67.051     | 11.5        | Hakkim et al. 2021                                                               |
| 7              | 71.047     | 0.3         | Derwent et. al. 2010                                                             |
| 8              | 73.026     | 0.1         | Derwent et. al. 2010                                                             |
| 9              | 79.052     | 29.4        | Hakkim et al. 2021                                                               |
| 10             | 83.047     | 42.3        | Hakkim et al. 2021, Xiong et. al. 2020                                           |
| 11             | 83.084     | 82.2        | Hakkim et al. 2021                                                               |
| 12             | 87.043     | 0.6         | Derwent et. al. 2010                                                             |
| 13             | 95.084     | 145.6       | Chan et. al. 2009, Kılıç et. al. 2018,<br>Hakkim et al. 2021, Xiong et. al. 2020 |
| 14             | 99.043     | 41.2        | Hakkim et al. 2021                                                               |
| 15             | 121.101    | 1           | Xiong et. al. 2020                                                               |
| 16             | 137.133    | 0.1         | Derwent et. al. 2010                                                             |
| 17             | 44.018     | 100         | Chan et. al. 2009, Kılıç et. al. 2018,<br>Hakkim et al. 2021, Xiong et. al. 2020 |
| 18             | 47.046     | 278.4       | Kılıç et. al. 2018, Hakkim et al. 2021,<br>Khare et. al. 2020                    |
| 19             | 49.007     | 188.2       | Hakkim et al. 2021                                                               |

|    |         |       |                                                                                  |
|----|---------|-------|----------------------------------------------------------------------------------|
| 20 | 62.997  | 188.2 | Kılıç et. al. 2018                                                               |
| 21 | 85.099  | 83.5  | Kılıç et. al. 2018, Hakkim et al. 2021,<br>Xiong et. al. 2020                    |
| 22 | 87.079  | 188.2 | Kılıç et. al. 2018                                                               |
| 23 | 91.053  | 69.4  | Chan et. al. 2009, Kılıç et. al. 2018,<br>Hakkim et al. 2021, Xiong et. al. 2020 |
| 24 | 97.100  | 229.4 | Kılıç et. al. 2018                                                               |
| 25 | 111.080 | 188.2 | Kılıç et. al. 2018                                                               |
| 26 | 115.039 | 75.3  | Chan et. al. 2009, Kılıç et. al. 2018,<br>Hakkim et al. 2021, Xiong et. al. 2020 |
| 27 | 119.085 | 117.6 | Kılıç et. al. 2018                                                               |
| 28 | 123.044 | 200   | Yee et. al. 2013                                                                 |
| 29 | 125.060 | 185   | Chan et. al. 2009, Kılıç et. al. 2018,<br>Hakkim et al. 2021, Khare et. al. 2020 |
| 30 | 127.075 | 129.4 | Kılıç et. al. 2018, Khare et. al. 2020                                           |
| 31 | 133.065 | 86.3  | Kılıç et. al. 2018, Hakkim et al. 2021,<br>Khare et. al. 2020                    |
| 32 | 133.102 | 176.5 | Xiong et. al. 2020                                                               |
| 33 | 138.056 | 221.6 | Chan et. al. 2009, Kılıç et. al. 2018,<br>Khare et. al. 2020                     |
| 34 | 145.051 | 88.2  | Khare et. al. 2020                                                               |
| 35 | 145.123 | 9.4   | Xiong et. al. 2020                                                               |
| 36 | 147.118 | 102.9 | Kılıç et. al. 2018, Khare et. al. 2020                                           |

|    |         |       |                                        |
|----|---------|-------|----------------------------------------|
| 37 | 149.096 | 70.6  | Khare et. al. 2020                     |
| 38 | 153.128 | 2.5   | Khare et. al. 2020                     |
| 39 | 155.144 | 0.9   | Khare et. al. 2020                     |
| 40 | 157.099 | 176.5 | Chan et. al. 2009, Khare et. al. 2020  |
| 41 | 161.134 | 114.7 | Kılıç et. al. 2018, Khare et. al. 2020 |
| 42 | 175.150 | 147.1 | Khare et. al. 2020                     |
| 43 | 177.056 | 170.6 | Khare et. al. 2020                     |
| 44 | 177.165 | 147.1 | Khare et. al. 2020                     |
| 45 | 179.181 | 4.6   | Khare et. al. 2020                     |
| 46 | 183.121 | 288.2 | Khare et. al. 2020                     |
| 47 | 185.121 | 35.3  | Witkowski et. al. 2017                 |
| 48 | 187.148 | 194.1 | Khare et. al. 2020                     |
| 49 | 189.165 | 194.1 | Khare et. al. 2020                     |
| 50 | 191.181 | 194.1 | Khare et. al. 2020                     |
| 51 | 217.195 | 252.9 | Khare et. al. 2020                     |
| 52 | 233.228 | 276.5 | Khare et. al. 2020                     |
| 53 | 247.243 | 305.9 | Khare et. al. 2020                     |

**Table S4:** Correlation table (R) for the 11 factors with independent tracer species.

| Tracer Species    | Cooking | Solvents | Road Construction | Biogenic   | Petrol 4-Wheeler | Paddy      | Heating & Waste Burning | Petrol 2-Wheeler | Industrial | Photo-chemical | CNG  |
|-------------------|---------|----------|-------------------|------------|------------------|------------|-------------------------|------------------|------------|----------------|------|
| WS                | -0.4    | -0.2     | -0.1              | 0.1        | -0.3             | -0.2       | -0.2                    | -0.2             | -0.3       | 0.0            | -0.2 |
| WD                | 0.1     | -0.1     | 0.2               | 0.1        | 0.0              | 0.1        | 0.2                     | 0.1              | -0.1       | 0.1            | 0.1  |
| CO <sub>2</sub>   | 0.2     | 0.2      | 0.1               | -0.3       | <b>0.7</b>       | 0.4        | 0.4                     | <b>0.7</b>       | <b>0.8</b> | -0.1           | 0.3  |
| N <sub>2</sub> O  | 0.0     | 0.0      | -0.1              | -0.1       | 0.2              | 0.0        | 0.1                     | 0.2              | 0.4        | -0.1           | 0.2  |
| CH <sub>4</sub>   | 0.2     | 0.3      | 0.0               | -0.3       | <b>0.6</b>       | 0.4        | 0.3                     | <b>0.6</b>       | <b>0.8</b> | -0.1           | 0.3  |
| PM <sub>10</sub>  | 0.3     | 0.2      | 0.1               | -0.2       | 0.4              | <b>0.7</b> | <b>0.7</b>              | 0.5              | 0.5        | 0.0            | 0.3  |
| PM <sub>2.5</sub> | 0.3     | 0.2      | 0.1               | -0.3       | 0.3              | <b>0.7</b> | <b>0.6</b>              | 0.4              | 0.5        | 0.0            | 0.2  |
| CO                | 0.3     | 0.3      | 0.1               | -0.2       | <b>0.7</b>       | 0.5        | 0.5                     | <b>0.6</b>       | <b>0.7</b> | -0.1           | 0.4  |
| NO                | 0.1     | 0.2      | 0.0               | -0.2       | <b>0.8</b>       | 0.3        | 0.4                     | 0.5              | <b>0.7</b> | -0.1           | 0.3  |
| NO <sub>2</sub>   | 0.1     | 0.1      | 0.1               | -0.2       | 0.3              | 0.3        | <b>0.7</b>              | 0.4              | 0.2        | 0.0            | 0.2  |
| NO <sub>x</sub>   | 0.1     | 0.2      | 0.0               | -0.2       | <b>0.8</b>       | 0.3        | 0.5                     | <b>0.6</b>       | <b>0.7</b> | -0.1           | 0.3  |
| O <sub>3</sub>    | 0.1     | -0.1     | 0.3               | 0.5        | -0.2             | 0.0        | -0.1                    | -0.2             | -0.3       | 0.4            | -0.2 |
| SO <sub>2</sub>   | 0.0     | -0.1     | -0.2              | -0.1       | 0.2              | 0.3        | 0.4                     | 0.2              | 0.2        | 0.0            | 0.2  |
| AT                | 0.2     | -0.1     | 0.2               | <b>0.7</b> | -0.2             | -0.3       | <b>-0.6</b>             | -0.3             | -0.4       | 0.3            | 0.1  |
| RH                | -0.1    | 0.1      | -0.2              | -0.5       | 0.0              | -0.2       | -0.4                    | -0.1             | 0.2        | -0.4           | -0.1 |
| PAR               | 0.2     | -0.2     | 0.2               | <b>0.7</b> | -0.2             | -0.1       | -0.2                    | -0.3             | -0.3       | 0.3            | -0.2 |
| VC                | -0.2    | -0.2     | 0.1               | <b>0.6</b> | -0.3             | -0.2       | -0.3                    | -0.3             | -0.4       | 0.2            | -0.2 |
| FC                | 0.4     | 0.3      | 0.2               | -0.3       | 0.3              | <b>0.8</b> | <b>0.6</b>              | 0.5              | 0.4        | 0.3            | 0.3  |

AT: Ambient Temperature, RH: Relative Humidity, PAR: Photosynthetic active radiation, VC: Ventilation Coefficient,

FC: Daily Fire Count

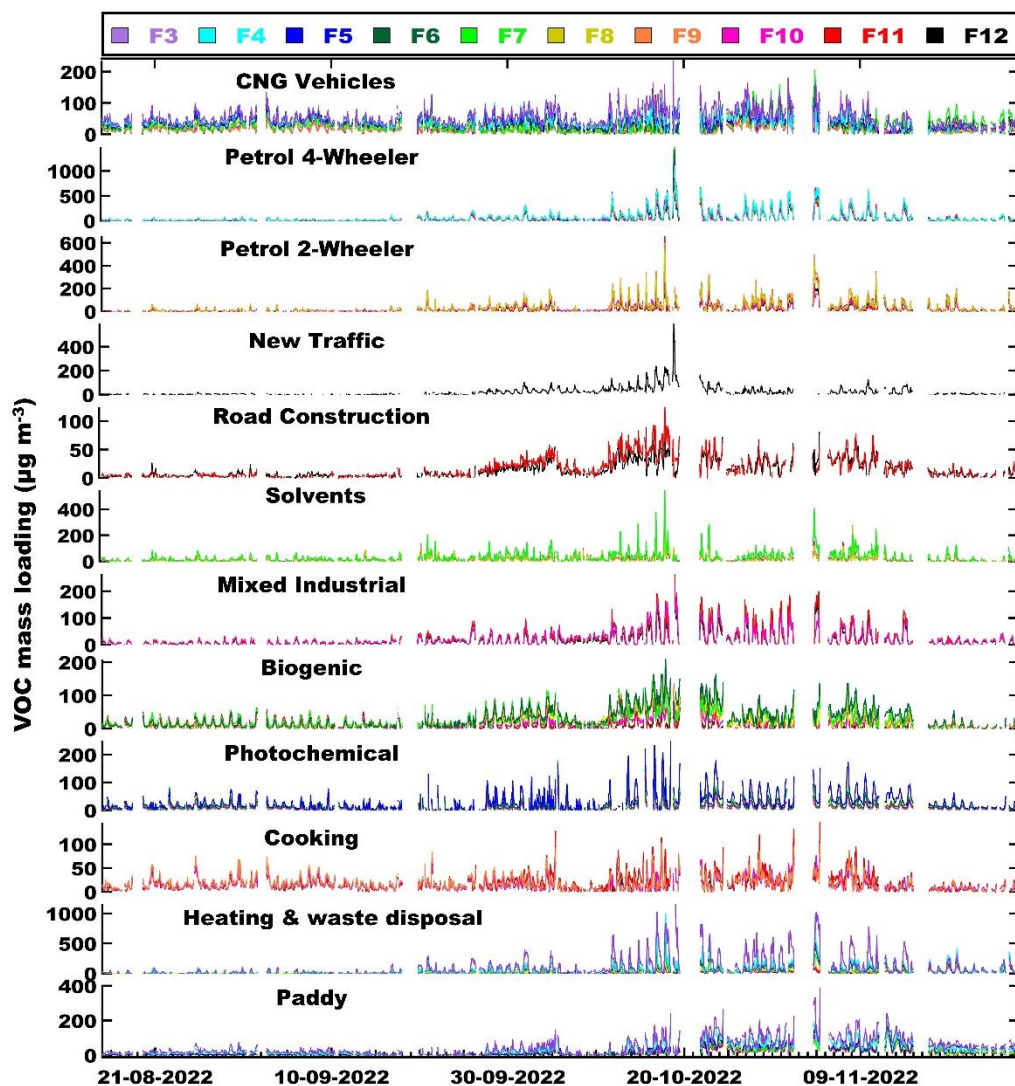

Figure S1(a): Evolution of the factor contribution time series when the number of factors is increased from 3 to 12

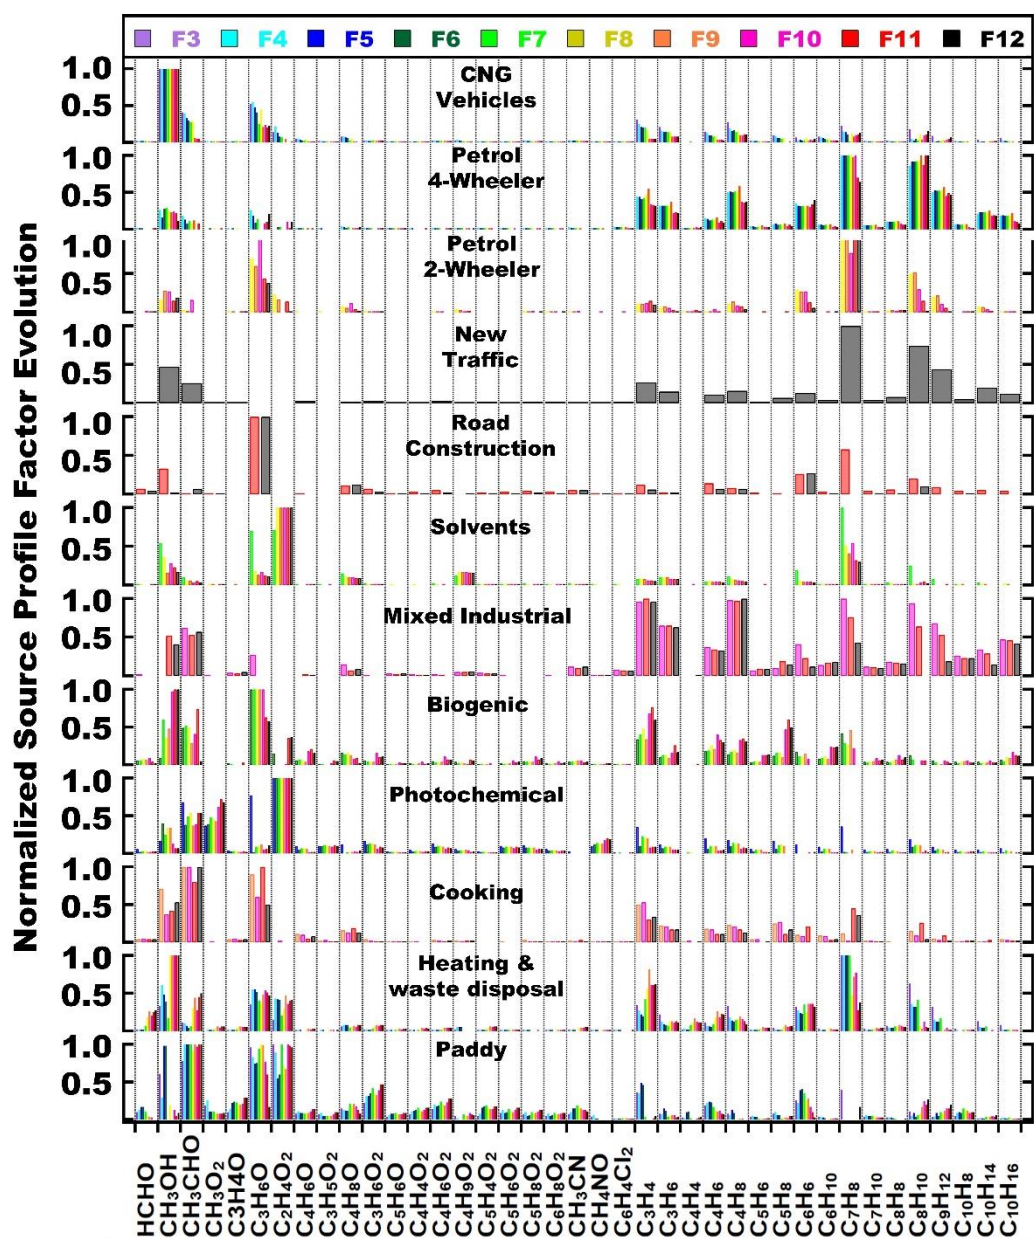

Figure S1(b): Evolution of the normalized PMF factor profile when the number of factors is increased from 3 to 12



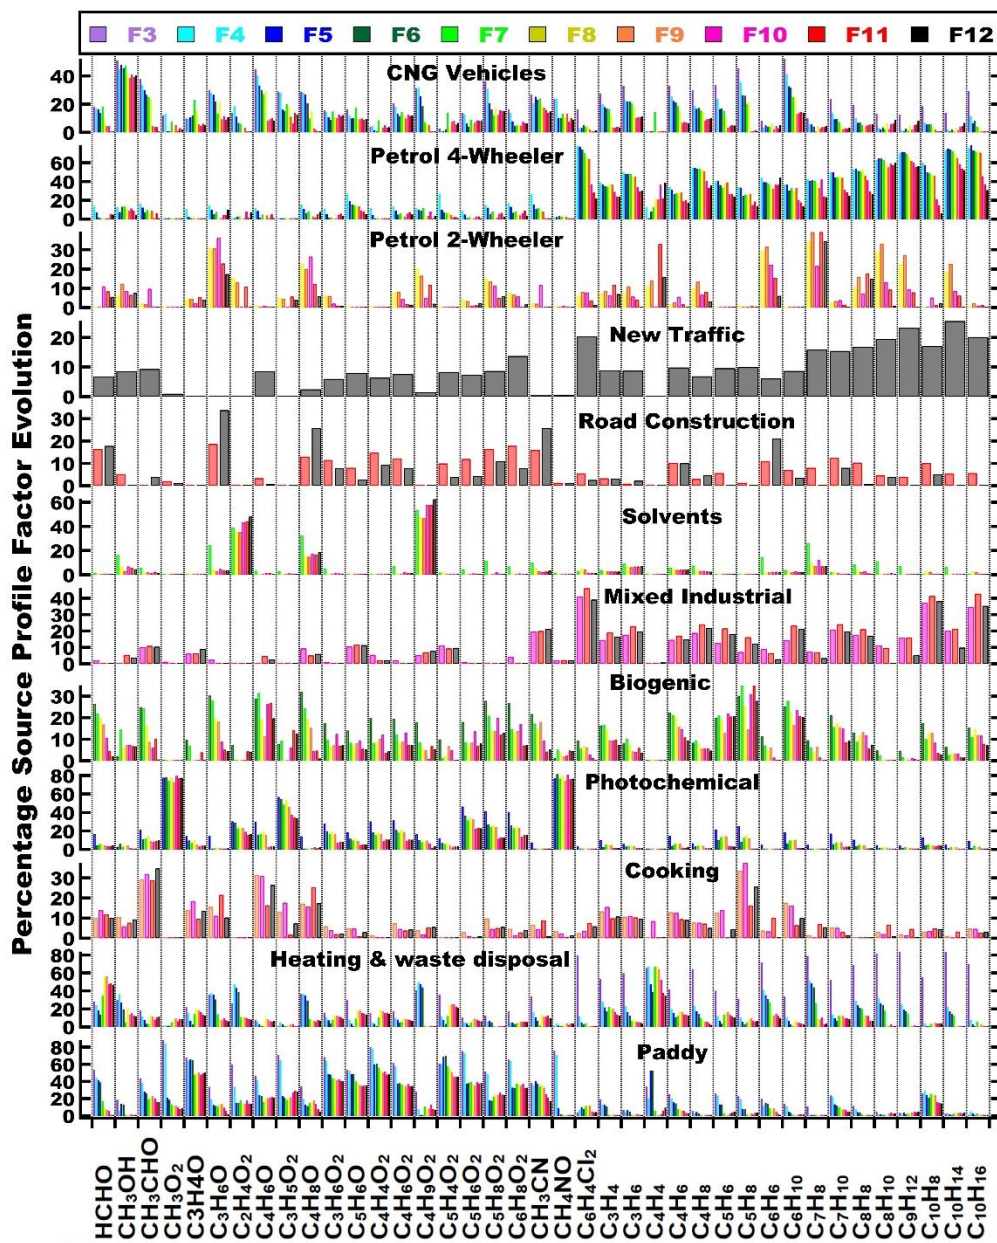

Figure S1(c): Evolution of the percentage of the mass explained by different sources when the number of factors is increased from 3 to 12



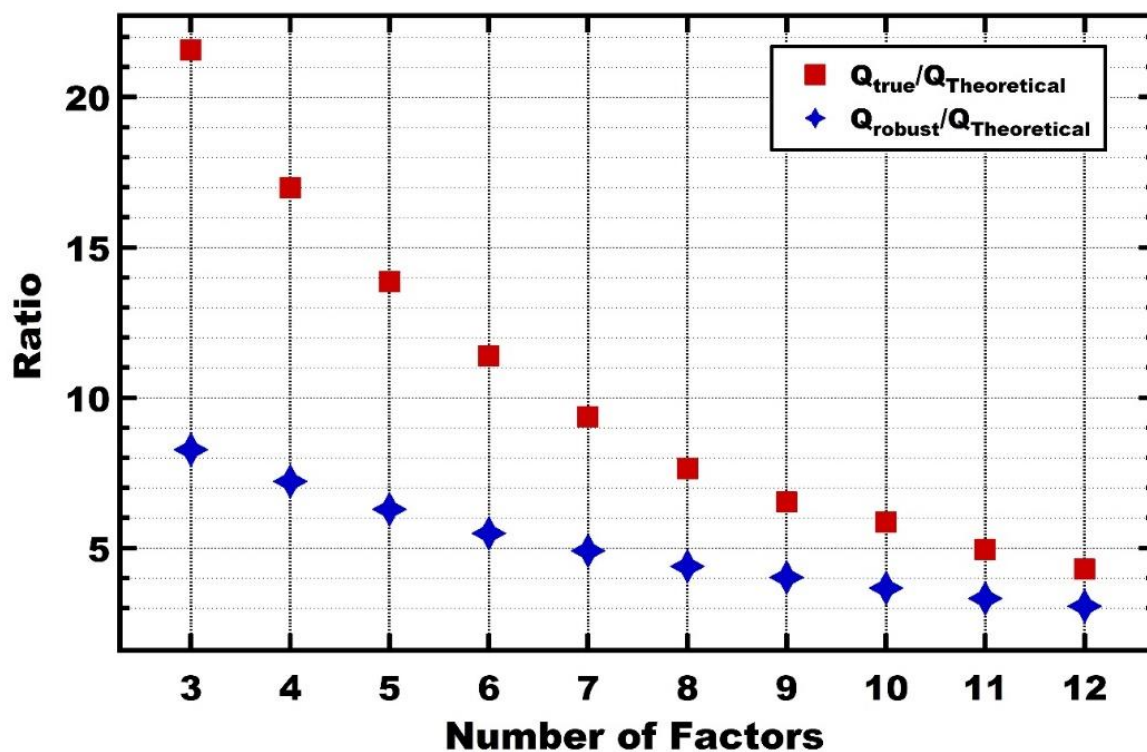

Figure S2: Change in the  $Q_{\text{true}}/Q_{\text{theoretical}}$  ratio and  $Q_{\text{robust}}/Q_{\text{theoretical}}$  when the number of factors is increased from 3 to 12

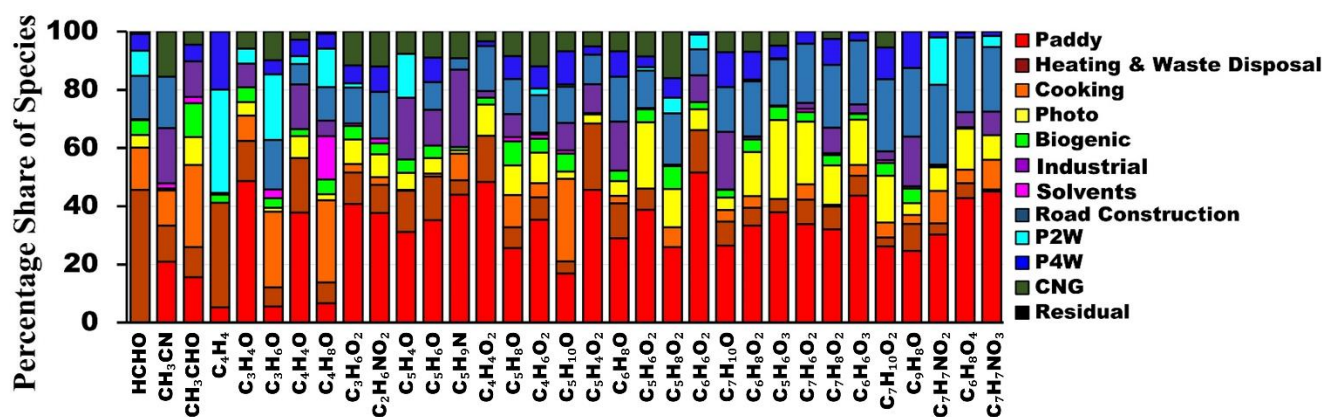

Figure S3(a): represents the share of species with the highest percentages in paddy residue burning, residential heating and waste disposal and solid fuel-based cooking factors

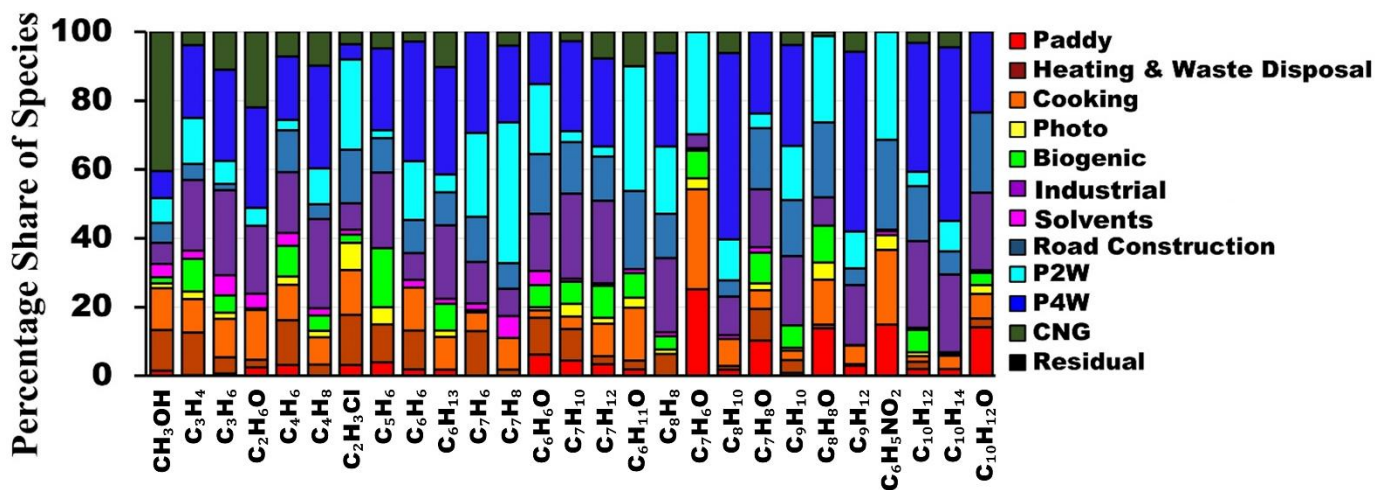

Figure S3(b): represents the share of species with the highest percentages in CNG, petrol 2-wheeler, petrol 4-wheeler factors.

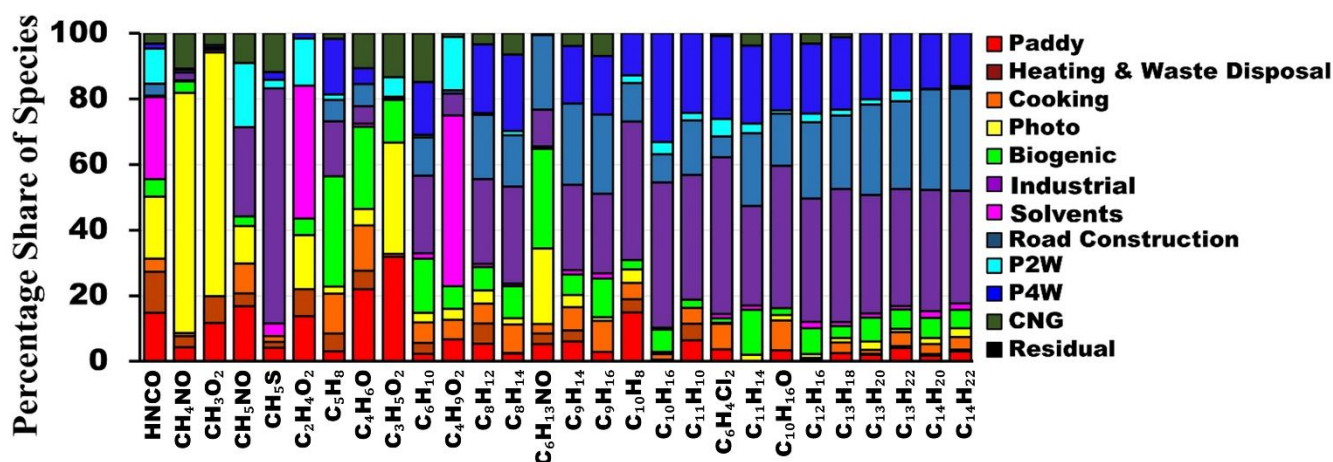

Figure S3(c): represents the share of species with the highest percentages in biogenic, photochemistry, solvents, and industrial factors.

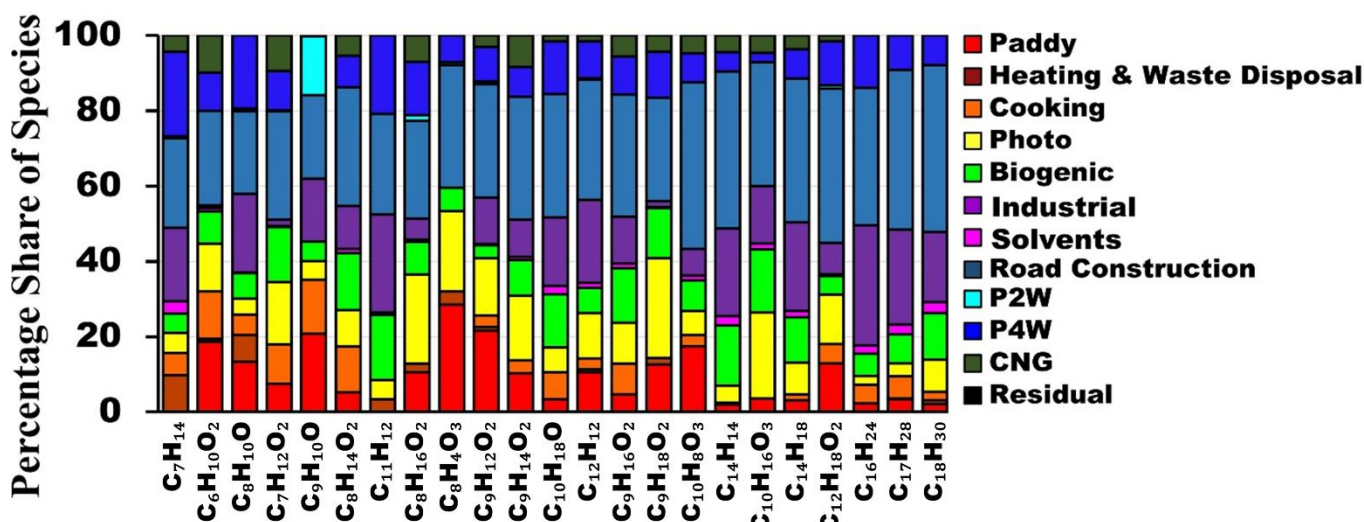

Figure S3(d): represents the share of species with the highest percentages in road construction factors.

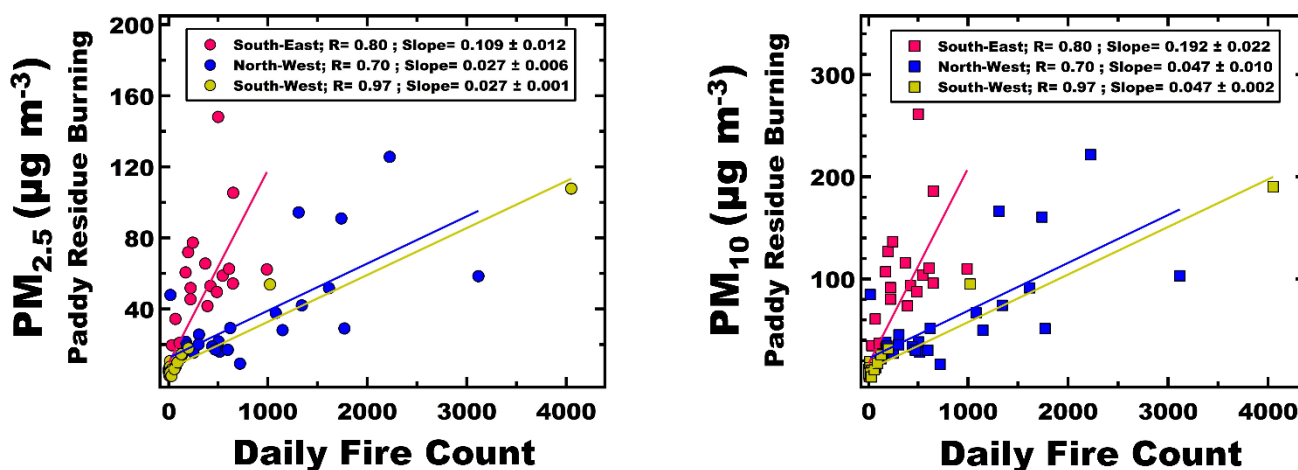

Figure S4: represents the PM<sub>2.5</sub> and PM<sub>10</sub> mass loadings from the paddy residue burning factor at the receptor site influenced by the 24-hour averaged fire count in three fetch regions (SE, NW, SW).

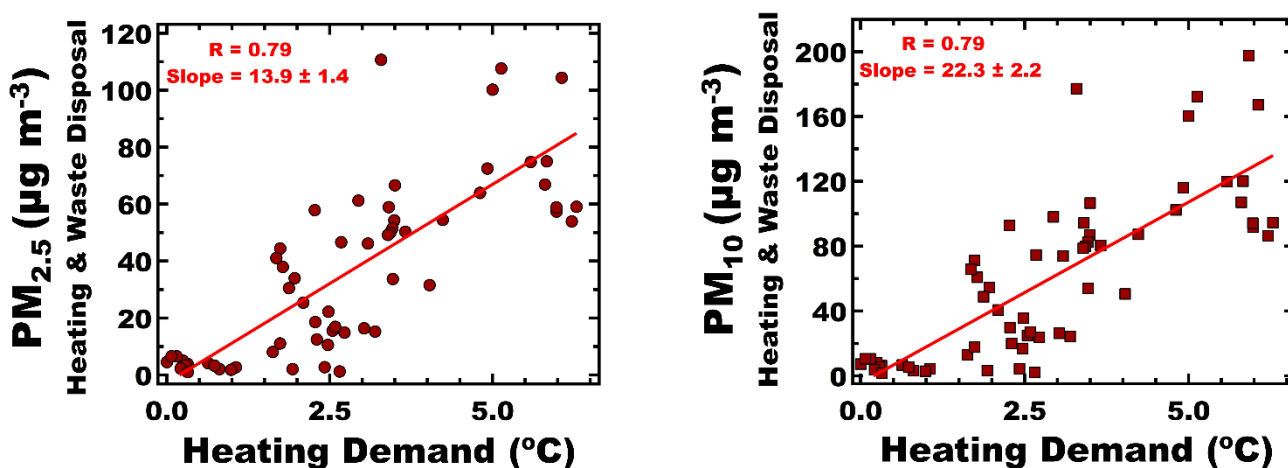

Figure S5: represents the PM<sub>2.5</sub> and PM<sub>10</sub> mass loadings at the receptor site with 24-hour averaged heating demand

#### References:

- Bruns, E. A., Slowik, J. G., El Haddad, I., Kilic, D., Klein, F., Dommen, J., Temime-Roussel, B., Marchand, N., Baltensperger, U., and Prévôt, A. S. H.: Characterization of gas-phase organics using proton transfer reaction time-of-flight mass spectrometry: Fresh and aged residential wood combustion emissions. *Atmos. Chem. Phys.*, 17(1), 705–720, <https://doi.org/10.5194/acp-17-705-2017>, 2017.
- Camredon, M., Hamilton, J. F., Alam, M. S., Wyche, K. P., Carr, T., White, I. R., Monks, P. S., Rickard, A. R., and Bloss, W. J.: Distribution of gaseous and particulate organic composition during dark  $\alpha$ -pinene ozonolysis, *Atmos. Chem. Phys.*, 10, 2893–2917, <https://doi.org/10.5194/acp-10-2893-2010>, 2010.
- Chan, A. W. H., Kautzman, K. E., Chhabra, P. S., Surratt, J. D., Chan, M. N., Crouse, J. D., Kürten, A., Wennberg, P. O., Flagan, R. C., and Seinfeld, J. H.: Secondary organic aerosol formation from photooxidation of naphthalene and

alkyl-naphthalenes: implications for oxidation of intermediate volatility organic compounds (IVOCs), *Atmos. Chem. Phys.*, 9, 3049–3060, <https://doi.org/10.5194/acp-9-3049-2009>, 2009.

Chandra, B. P., and Sinha, V.: Contribution of post-harvest agricultural paddy residue fires in the N.W. Indo-Gangetic Plain to ambient carcinogenic benzenoids, toxic isocyanic acid and carbon monoxide. *Environ. Int.*, 88, 187–197, <https://doi.org/10.1016/J.ENVINT.2015.12.025>, 2016.

Coggon, M. M., Lim, C. Y., Koss, A. R., Sekimoto, K., Yuan, B., Gilman, J. B., Hagan, D. H., Selimovic, V., Zarzana, K. J., Brown, S. S., Roberts, J. M., Müller, M., Yokelson, R., Wisthaler, A., Krechmer, J. E., Jimenez, J. L., Cappa, C., Kroll, J. H., De Gouw, J., and Warneke, C.: OH chemistry of non-methane organic gases (NMOGs) emitted from laboratory and ambient biomass burning smoke: evaluating the influence of furans and oxygenated aromatics on ozone and secondary NMOG formation. *Atmos. Chem. Phys.*, 19, 14875–14899, <https://doi.org/10.5194/acp-19-14875-2019>, 2019.

Derwent, R. G., Jenkin, M. E., Saunders, S. M., and Pilling, M. J.: Photochemical ozone creation potentials for organic compounds in northwest Europe calculated with a master chemical mechanism. *Atmos. Environ.*, 32(14–15), 2429–2441, [https://doi.org/10.1016/S1352-2310\(98\)00053-3](https://doi.org/10.1016/S1352-2310(98)00053-3), 1998.

Derwent, R. G., Jenkin, M. E., Utembe, S. R., Shallcross, D. E., Murrells, T. P., and Passant, N. R.: Secondary organic aerosol formation from a large number of reactive man-made organic compounds. *Sci. Total. Environ.*, 408(16), 3374–3381, <https://doi.org/10.1016/J.SCITOTENV.2010.04.013>, 2010.

Fleming, L. T., Weltman, R., Yadav, A., Edwards, R. D., Arora, N. K., Pillarisetti, A., Meinardi, S., Smith, K. R., Blake, D. R., and Nizkorodov, S. A.: Emissions from village cookstoves in Haryana, India, and their potential impacts on air quality, *Atmos. Chem. Phys.*, 18, 15169–15182, <https://doi.org/10.5194/acp-18-15169-2018>, 2018.

Fukusaki, Y., Kousa, Y., Umehara, M., Ishida, M., Sato, R., Otagiri, K., Hoshi, J., Nudjima, C., Takahashi, K., and Nakai, S.: Source region identification and source apportionment of volatile organic compounds in the Tokyo Bay coastal area, *Japan. Atmos. Environ.: X*, 9, <https://doi.org/10.1016/j.aeaoa.2021.100103>, 2021.

Gkatzelis, G. I., Hohaus, T., Tillmann, R., Gensch, I., Müller, M., Eichler, P., Xu, K.-M., Schlag, P., Schmitt, S. H., Yu, Z., Wegener, R., Kaminski, M., Holzinger, R., Wisthaler, A., and Kiendler-Scharr, A.: Gas-to-particle partitioning of major biogenic oxidation products: a study on freshly formed and aged biogenic SOA, *Atmos. Chem. Phys.*, 18, 12969–12989, <https://doi.org/10.5194/acp-18-12969-2018>, 2018.

Guenther, A., Karl, T., Harley, P., Wiedinmyer, C., Palmer, P. I., and Geron, C.: Estimates of global terrestrial isoprene emissions using MEGAN (Model of Emissions of Gases and Aerosols from Nature). *Atmos. Chem. Phys.*, 6(11), 3181–3210, <https://doi.org/10.5194/ACP-6-3181-2006>, 2006.

Haeri, F.: Molecular Speciation of Organic Nitrogen Compounds Separated in Smoke Particles Emitted from Burning Western U.S. Wildland Fuels, PhD thesis, Carnegie Mellon University, Pittsburgh, PA, USA, <https://doi.org/10.1184/R1/22670578.v1>, 2023.

Hakkim, H., Kumar, A., Annadate, S., Sinha, B., and Sinha, V.: RTEII: A new high-resolution ( $0.1^\circ \times 0.1^\circ$ ) road transport emission inventory for India of 74 speciated NMVOCs, CO, NO<sub>x</sub>, NH<sub>3</sub>, CH<sub>4</sub>, CO<sub>2</sub>, PM<sub>2.5</sub> reveals massive overestimation of NO<sub>x</sub> and CO and missing nitromethane emissions by existing inventories. *Atmos. Environ.: X*, 11, 100118, <https://doi.org/10.1016/J.AEAOA.2021.100118>, 2021.

Harrison, M. A., Barra, S., Borghesi, D., Vione, D., Arsene, C., and Olariu, R. I.: Nitrated phenols in the atmosphere: a review. *Atmos. Environ.*, 39(2), 231–248, <https://doi.org/10.1016/j.atmosenv.2004.09.044>, 2005.

Hatch, L. E., Luo, W., Pankow, J. F., Yokelson, R. J., Stockwell, C. E., and Barsant K. C.: Identification and quantification of gaseous organic compounds emitted from biomass burning using two-dimensional gas chromatography–time-of-flight mass spectrometry. *Atmos. Chem. Phys.*, 15, 1865–1899, <https://doi.org/10.5194/acp-15-1865-2015>, 2015.

Hatch, L. E., Yokelson, R. J., Stockwell, C. E., Veres, P. R., Simpson, I. J., Blake, D. R., Orlando, J. J., and Barsanti K. C.: Multi-instrument comparison and compilation of non-methane organic gas emissions from biomass burning and implications for smoke-derived secondary organic aerosol precursors. *Atmos. Chem. Phys.*, 17, 1471–1489, <https://doi.org/10.5194/acp-17-1471-2017>, 2017.



Hsu, C. Y., Wu, P. Y., Chen, Y. C., Chen, P. C., Guo, Y. L., Lin, Y. J., and Lin, P.: An integrated strategy by using long-term monitoring data to identify volatile organic compounds of high concern near petrochemical industrial parks. *Sci. Total Environ.*, 821, <https://doi.org/10.1016/j.scitotenv.2022.153345>, 2022.

Jordan, C., Fitz, E., Hagan, T., Sive, B., Frinak, E., Haase, K., Cottrell, L., Buckley, S., and Talbot, R.: Long-term study of VOCs measured with PTR-MS at a rural site in New Hampshire with urban influences. *Atmos. Chem. Phys.*, 9(14), 4677–4697, <https://doi.org/10.5194/ACP-9-4677-2009>, 2009.

Kamarulzaman, N. H., Le-Minh, N., and Stuetz, R. M.: Identification of VOCs from natural rubber by different headspace techniques coupled using GC-MS. *Talanta*, 191, 535–544, <https://doi.org/10.1016/j.talanta.2018.09.019>, 2019.

Khare, P., Machesky, J., Soto, R. He, M., Presto, A. A. and Gentner, D. R.: Asphalt-related emissions are a major missing nontraditional source of secondary organic aerosol precursors. *Science Advances* 6, eabb9785, <https://doi.org/10.1126/sciadv.abb9785>, 2020.

Kılıç, D., El Haddad, I., Brem, B. T., Bruns, E., Bozetti, C., Corbin, J., Durdina, L., Huang, R.-J., Jiang, J., Klein, F., Lavi, A., Pieber, S. M., Rindlisbacher, T., Rudich, Y., Slowik, J. G., Wang, J., Baltensperger, U., and Prévôt, A. S. H.: Identification of secondary aerosol precursors emitted by an aircraft turbofan, *Atmos. Chem. Phys.*, 18, 7379–7391, <https://doi.org/10.5194/acp-18-7379-2018>, 2018.

Koss, A. R., Sekimoto, K., Gilman, J. B., Selimovic, V., Coggon, M. M., Zarzana, K. J., Yuan, B., Lerner, B. M., Brown, S. S., Jimenez, J. L., Krechmer, J., Roberts, J. M., Warneke, C., Yokelson, R. J., and De Gouw, J.: Non-methane organic gas emissions from biomass burning: Identification, quantification, and emission factors from PTR-ToF during the FIREX 2016 laboratory experiment. *Atmos. Chem. Phys.*, 18(5), 3299–3319, <https://doi.org/10.5194/ACP-18-3299-2018>, 2018.

Kumar, A., Hakkim, H., Sinha, B., and Sinha, V.: Gridded 1 km × 1 km emission inventory for paddy stubble burning emissions over north-west India constrained by measured emission factors of 77 VOCs and district-wise crop yield data. *Sci. Total Environ.*, 789, 148064, <https://doi.org/10.1016/J.SCITOTENV.2021.148064>, 2021.

Kumar, A., Sinha, V., Shabin, M., Hakkim, H., Bonsang, B., and Gros, V.: Non-methane hydrocarbon (NMHC) fingerprints of major urban and agricultural emission sources for use in source apportionment studies. *Atmos. Chem. Phys.*, 20(20), 12133–12152, <https://doi.org/10.5194/ACP-20-12133-2020>, 2020.

Lignell, H., Epstein, S. A., Marvin, M. R., Shemesh, D., Gerber, B., and Nizkorodov, S.: Experimental and Theoretical Study of Aqueous cis-Pinonic Acid Photolysis. *J. Phys. Chem. A* 2013, 117, 12930–12945, <https://doi.org/10.1021/jp4093018>, 2013.

Loubet, B., Buysse, P., Gonzaga-Gomez, L., Lafouge, F., Ciuraru, R., Decuq, C., Kammer, J., Bsaibes, S., Boissard, C., Durand, B., Gueudet, J.-C., Fanucci, O., Zurfluh, O., Abis, L., Zannoni, N., Truong, F., Baisnée, D., Sarda-Estève, R., Staudt, M., and Gros, V.: Volatile organic compound fluxes over a winter wheat field by PTR-Qi-TOF-MS and eddy covariance, *Atmos. Chem. Phys.* 22, 2817–2842, <https://doi.org/10.5194/acp-22-2817-2022>, 2022.

Mochizuki, T., Kawamura, K., Miyazaki, Y., Kunwar, B., and Boreddy, S. K. R.: Distributions and sources of low-molecular-weight monocarboxylic acids in gas and particles from a deciduous broadleaf forest in northern Japan. *Atmos. Chem. Phys.*, 19(4), 2421–2432, <https://doi.org/10.5194/acp-19-2421-2019>, 2019.

Nowakowska, M., Herbinet, O., Dufour, A., and Glaude, P. A.: Kinetic Study of the Pyrolysis and Oxidation of Guaiacol. *J. Phys. Chem. A*, 122(39), 7894–7909, <https://doi.org/10.1021/acs.jpca.8b06301>, 2018.

Palm, B., Peng, Q., Fredrickson, C. D., Lee B. H., Garofalo, L. A., Pothier, M. A., Kreidenweis S. M., Farmer D. K., Pokhrel, R. P., Shen, Y., Murphy S. M., Permar W., Hu L. Campos T.L., Hall S. R., Ullmann K., Zhang, X., Flocke, F., Fischer, E. V., and Thornton, J. A.: Quantification of organic aerosol and brown carbon evolution in fresh wildfire plumes. *P. Natl. Acad. Sci. USA*, 117 (47) 29469–29477, <https://doi.org/10.1073/pnas.2012218117>, 2020.

Ramasamy, S., Nakayama, T., Imamura, T., Morino, Y., Kajii, Y. and Sato, K.: Investigation of dark condition nitrate radical- and ozone-initiated aging of toluene secondary organic aerosol: Importance of nitrate radical reactions with phenolic products. *Atmos. Environ.* 219, 117049, <https://doi.org/10.1016/j.atmosenv.2019.117049>, 2019.

Sarkar, C., Sinha, V., Kumar, V., Rupakheti, M., Panday, A., Mahata, K. S., Rupakheti, D., Kathayat, B., and Lawrence, M. G.: Overview of VOC emissions and chemistry from PTR-TOFMS measurements during the SusKat-ABC campaign: high

acetaldehyde, isoprene and isocyanic acid in wintertime air of the Kathmandu Valley. *Atmos. Chem. Phys.*, 16, 3979–4003, <https://doi.org/10.5194/acp-16-3979-2016>, 2016.

Sarkar, C., Sinha, V., Sinha, B., Panday, A. K., Rupakheti, M., and Lawrence, M. G.: Source apportionment of NMVOCs in the Kathmandu Valley during the SusKat-ABC international field campaign using positive matrix factorization. *Atmos. Chem. Phys.*, 17(13), 8129–8156, <https://doi.org/10.5194/ACP-17-8129-2017>, 2017.

Stockwell, C. E., Veres, P. R., Williams, J., and Yokelson, R. J.: Characterization of biomass burning emissions from cooking fires, peat, crop residue, and other fuels with high-resolution proton-transfer-reaction time-of-flight mass spectrometry. *Atmos. Chem. Phys.*, 15, 845–865, <https://doi.org/10.5194/acp-15-845-2015>, 2015.

Toda, K., Obata, T., Obokin, V. A., Potemkin, V. L., Hirota, K., Takeuchi, M., Arita, S., Khodzher, T. V., and Grachev, M. A.: Atmospheric methanethiol emitted from a pulp and paper plant on the shore of Lake Baikal, *Atmos. Environ.*, 44, 2427–2433, <https://doi.org/10.1016/j.atmosenv.2010.03.037>, 2010.

Wang, Z., Yuan, B., Ye, C., Roberts, J., Wisthaler, A., Lin, Y., Li, T., Wu, C., Peng, Y., Wang, C., Wang, S., Yang, S., Wang, B., Qi, J., Wang, C., Song, W., Hu, W., Wang, X., Xu, W., ... Shao, M.: High Concentrations of Atmospheric Isocyanic Acid (HNCO) Produced from Secondary Sources in China. *Environ. Sci. Technol.*, 54(19), 11818–11826, <https://doi.org/10.1021/acs.est.0c02843>, 2020.

Wang, M., Wang, Q., Ho, S. S. H., Li, H., Zhang, R., Ran, W., Que, L.: Chemical characteristics and sources of nitrogen-containing organic compounds at a regional site in the North China Plain during the transition period of autumn and winter. *Sci. Total. Environ.*, 812, 151451, <https://doi.org/10.1016/j.scitotenv.2021.151451>, 2022.

Witkowski, B., and Gierczak, T.: cis-Pinonic acid oxidation by hydroxyl radicals in the aqueous phase under acidic and basic conditions: kinetics and mechanism. *Environ. Sci. Technol.*, 51(17), 9765–9773, <https://doi.org/10.1021/acs.est.7b02427>, 2017.

Xing, C., Wan, Y., Wang, Q., Kong, S., Huang, X., Ge, X., et al.: Molecular characterization of brown carbon chromophores in atmospherically relevant samples and their gas-particle distribution and diurnal variation in the atmosphere. *J. Geophys. Res.-Atmos.*, 128, e2022JD038142, <https://doi.org/10.1029/2022JD038142>, 2023.

Xiong, Y., Zhou, J., Xing, Z., and Du, K.: Optimization of a volatile organic compound control strategy in an oil industry center in Canada by evaluating ozone and secondary organic aerosol formation potential. *Environ. Res.*, 191, 110217, <https://doi.org/10.1016/j.envres.2020.110217>, 2020.

Xu, C., Gao, L., Lyu, C., Qiao, L., Huang, D., Liu, Y., Li, D. and Zheng, M.: Molecular characteristics, sources and environmental risk of aromatic compounds in particulate matter during COVID-2019: Nontarget screening by ultra-high resolution mass spectrometry and comprehensive two-dimensional gas chromatography. *Environ. Int.*, 167, 107421, <https://doi.org/10.1016/j.envint.2022.107421>, 2022.

Yáñez-Serrano, A. M., Filella, I., LLusià, J., Gargallo-Garriga, A., Granda, V., Bourtsoukidis, E., Williams, J., Seco, R., Cappellin, L., Werner, C., de Gouw, J., and Peñuelas, J.: GLOVOCS - Master compound assignment guide for proton transfer reaction mass spectrometry users. *Atmos. Environ.*, 244, 117929, <https://doi.org/10.1016/J.ATMOSENV.2020.117929>, 2021.

Yao, L., Wang, M.-Y., Wang, X. -K., Liu, Y.-J., Chen, H.-F., Zheng, J., Nie, W., Ding, A.-J., Geng, F.-H., Wang, D.-F., Chen, J.-M., Worsnop, D. R. and Wang, L.: Detection of atmospheric gaseous amines and amides by a high-resolution time-of-flight chemical ionization mass spectrometer with protonated ethanol reagent ions. *Atmos. Chem. Phys.*, 16, 14527–14543. <https://doi.org/10.5194/acp-16-14527-2016>, 2016.

Zaytsev, A., Koss, A. R., Breitenlechner, M., Krechmer, J. M., Nihill, K. J., Lim, C. Y., Rowe, J. C., Cox, J. L., Moss, J., Roscioli, J. R., Canagaratna, M. R., Worsnop, D. R., Kroll, J. H., and Keutsch, F. N.: Mechanistic Study of Formation of Ring-retaining and Ring-opening Products from Oxidation of Aromatic Compounds under Urban Atmospheric Conditions. *Atmos. Chem. Phys.*, 19, 15117–15129, <https://doi.org/10.5194/acp-19-15117-2019>, 2019.
